# Supplementary material
Source: publisher site journal article supplement (https://www.dovepress.com/get_supplementary_file.php?f=350698.docx)
Supplement: Supplementary file 1 [file get_supplementary_file.php]

**Supplementary Table 1 Sequences of small interfering RNA**

| siRNA | Sense (5’-3’) | Antisense (5’-3) |
| --- | --- | --- |
| siCTRL | UUCUCCGAACGUGUCACGUTT | ACGUGACACGUUCGGAGAATT |
| siROR2-1# | GAGCCAGUAAACAAUAUCATT | UGAUAUUGUUUACUGGCUCTT |
| siROR2-2# | CACAGCCCAAAUCAUAACUTT | AGUUAUGAUUUGGGCUGUGTT |
| siROR2-3# | CUGGUGCUUUACGCAGAAUTT | AUUCUGCGUAAAGCACCAGTT |

**Supplementary Table 2 Sequence of primers**

| Target genes | Forward (5’-3’) | Reverse (5’-3) |
| --- | --- | --- |
| *ALP* | GGCGGTGAACGAGAGAATGT | GGACGTAGTTCTGCTCGTGG |
| *Osterix* | GCTTGAGGAGGAAGTTCACTA | GAGTTGTTGAGTCCCGCAGA |
| *ROR2* | TATGGTTCACGACTGCGAATCC | AGTGGCGGTAATGGTCTTCATC |
| *RUNX2* | CGAATGGCAGCACGCTATTAA | GTCGCCAAACAGATTCATCCA |
| *TAZ* | GATGCTTCTGGACCAAGTACA | AGATGTGGCGGAGTTTCAGG |
| *β-catenin* | GGCTTGGAATGAGACTGCTG | GGTCCATACCCAAGGCATCC |
| *GAPDH* | GCACCGTCAAGGCTGAGAAC | TGGTGAAGACGCCAGTGGA |
